# Supplementary material for: The Effect of Protein Supplementation versus Carbohydrate Supplementation on Muscle Damage Markers and Soreness Following a 15-km Road Race: A Double-Blind Randomized Controlled Trial
Source: PubMed Central journal article supplement (PMC7999032; doi:10.3390/nu13030858), 2021-03-05
Supplement: nutrients-13-00858-s001.pdf [file nutrients-13-00858-s001.pdf]

**Supplemental table S1.** Habitual dietary intake of participants in the protein and placebo group on the day of the race before and after the race, based on ITT

|                          | Before the race           |                           |         | After the race            |                           |         |
|--------------------------|---------------------------|---------------------------|---------|---------------------------|---------------------------|---------|
|                          | Protein<br><i>n</i> = 134 | Placebo <i>n</i> =<br>127 | P-value | Protein<br><i>n</i> = 134 | Placebo <i>n</i> =<br>127 | P-value |
| Energy intake, kcal      | 853 ± 391                 | 854 ± 349                 | 0.98    | 1425 ± 601                | 1423 ± 621                | 0.97    |
| Protein intake, g        | 28.9 ± 15.2               | 29.7 ± 14.2               | 0.66    | 47.2 ± 27.5               | 49.9 ± 31.9               | 0.46    |
| Protein intake, g/kg/d   | 0.40 ± 0.20 <sup>a</sup>  | 0.43 ± 0.19 <sup>b</sup>  | 0.34    | 0.65 ± 0.33 <sup>c</sup>  | 0.67 ± 0.34 <sup>d</sup>  | 0.69    |
| Animal protein, %        | 39.6 ± 23.9               | 40.8 ± 24.6               | 0.67    | 52.7 ± 21.4               | 52.0 ± 24.9               | 0.82    |
| Plant protein, %         | 60.5 ± 24.0               | 59.1 ± 24.5               | 0.65    | 47.3 ± 21.5               | 48.1 ± 25.0               | 0.79    |
| Protein, en%             | 14.2 ± 5.5                | 14.1 ± 4.4                | 0.90    | 13.6 ± 5.9                | 14.5 ± 6.6                | 0.26    |
| Fat intake, en%          | 25.5 ± 11.7               | 28.2 ± 11.2               | 0.057   | 33.5 ± 11.3               | 33.6 ± 13.4               | 0.98    |
| Carbohydrate intake, en% | 57.0 ± 12.5               | 54.8 ± 12.3               | 0.16    | 43.9 ± 12.3               | 43.6 ± 14.2               | 0.83    |
| Alcohol intake, g        | 0.0<br>(0.0 – 0.0)        | 0.0<br>(0.0 – 0.0)        | 0.98 ‡  | 7.9<br>(0.0 – 25.9)       | 0.0<br>(0.0 – 18.9)       | 0.25 ‡  |
| Non-drinker, n (%)       | -                         | -                         | -       | 61 (50)                   | 67 (57)                   | 0.29    |
| Low- drinker, n (%)      | -                         | -                         | -       | 31 (25)                   | 31 (26)                   |         |
| Moderate drinker, n (%)  | -                         | -                         | -       | 27 (22)                   | 14 (12)                   |         |
| High drinker, n (%)      | -                         | -                         | -       | 3 (3)                     | 6 (5)                     |         |

Data are presented as mean ± SD or median (interquartile range (IQR)). en%, energy percentage; ITT, Intention-to-treat analysis.

<sup>a</sup> *n* = 97, <sup>b</sup> *n* = 106, <sup>c</sup> *n* = 97, <sup>d</sup> *n* = 106.

P-values for differences between groups were derived by independent samples t-test unless indicated otherwise. ‡

Derived by Mann-Whitney U-test.

**Supplemental table S2.** Baseline and post-race NPRS scores for perceived **lower extremity** muscle soreness, based on PP

|                     |                                   | <b>Protein</b> | <b>Placebo</b> | <b>P-value</b> |
|---------------------|-----------------------------------|----------------|----------------|----------------|
| <b>Time</b>         |                                   |                |                |                |
|                     |                                   | <i>n = 150</i> | <i>n = 150</i> |                |
| Baseline            | Worst muscle soreness             | 0.67 ± 1.61    | 0.66 ± 1.58    | 0.93           |
|                     | Least muscle soreness             | 0.27 ± 0.78    | 0.20 ± 0.69    | 0.53           |
|                     | Average muscle soreness past 24 h | 0.45 ± 1.08    | 0.44 ± 1.14    | 0.96           |
|                     |                                   | <i>n = 137</i> | <i>n = 139</i> |                |
| 1 day<br>post-race  | Worst muscle soreness             | 4.02 ± 2.81    | 3.60 ± 3.00    | 0.21           |
|                     | Least muscle soreness             | 1.77 ± 1.97    | 1.27 ± 1.74    | <b>0.017</b>   |
|                     | Average muscle soreness past 24 h | 2.96 ± 2.27    | 2.46 ± 2.38    | <b>0.039</b>   |
|                     |                                   | <i>n = 124</i> | <i>n = 127</i> |                |
| 2 days<br>post-race | Worst muscle soreness             | 2.71 ± 2.35    | 2.38 ± 2.62    | 0.15           |
|                     | Least muscle soreness             | 1.18 ± 1.54    | 1.13 ± 1.66    | 0.30           |
|                     | Average muscle soreness past 24 h | 1.93 ± 1.87    | 1.68 ± 2.08    | 0.09           |
|                     |                                   | <i>n = 105</i> | <i>n = 109</i> |                |
| 3 days<br>post-race | Worst muscle soreness             | 1.36 ± 2.02    | 1.16 ± 1.71    | 0.86           |
|                     | Least muscle soreness             | 0.50 ± 1.01    | 0.43 ± 0.76    | 0.99           |
|                     | Average muscle soreness past 24 h | 0.90 ± 1.48    | 0.79 ± 1.17    | 0.97           |

Data are presented as mean ± SD.

NPRS; numeric pain rating scale; PP, Per-protocol analysis

P-values for differences between groups were derived by Mann-Whitney U-test.

**Supplemental table S3.** Pressure pain thresholds with a strain gauge algometer measured 1 and 2 days post-race, based on PP

|                        | Protein<br><i>n</i> = 63 | Placebo <i>n</i> = 69 | P-value      |
|------------------------|--------------------------|-----------------------|--------------|
| M. vastus lateralis, N | 75.0 ± 34.6              | 83.2 ± 33.4           | 0.17         |
| M. rectus femoris, N   | 80.6 ± 35.9              | 93.5 ± 31.3           | <b>0.029</b> |
| M. vastus medialis, N  | 59.9 ± 25.9              | 74.9 ± 30.2           | <b>0.003</b> |
| Average 3 muscles, N   | 71.8 ± 30.0              | 83.9 ± 27.9           | <b>0.019</b> |

Data are presented as mean ± SD.

M, musculus; PP, Per-protocol analysis

P-values for differences between groups were derived by independent samples t-test

**Supplemental table S4.** Muscle damage markers measured 1 and 2 days post-race, based on PP

|          | Protein<br><i>n</i> = 63     | Placebo<br><i>n</i> = 68     | P-value |
|----------|------------------------------|------------------------------|---------|
| CK, U/L  | 285 (172 – 516)              | 346 (196 – 508)              | 0.30    |
| LDH, U/L | 181 (144 – 201) <sup>a</sup> | 171 (147 – 197) <sup>b</sup> | 0.60    |

Data are presented as median (interquartile range (IQR)).

CK; creatine kinase, LDH, lactate dehydrogenase; PP, Per-protocol analysis, U/L, unit/liter.

<sup>a</sup> *n* = 62, <sup>b</sup> *n* = 67, due to hemolysis.

P-values for differences between groups were derived by Mann-Whitney U-test.
